# Supplementary material
Source: HighWire-hosted journal article supplement (http://cmajopen.ca/highwire/filestream/80894/field_highwire_adjunct_files/1/open-2016-0009-original-submission.pdf)
Supplement: open-2016-0009-original-submission.pdf [file open-2016-0009-original-submission.pdf]

1  
2  
3  
4  
5  
6  
7  
8 Using Ontario Health Insurance Plan physician billing claims to ascertain  
9  
10 individual influenza immunization status: An updated validation study  
11

12 Kevin L. Schwartz MD MSc<sup>1,2</sup>, Nathaniel Jembere MPH<sup>1</sup>, Michael A. Campitelli MPH<sup>1</sup>, Sarah A.

13 Buchan MSc<sup>3</sup>, Hannah Chung MPH,<sup>1</sup> Jeffrey C. Kwong MD MSc<sup>1,4</sup>  
14  
15  
16  
17

18 <sup>1</sup>Institute for Clinical Evaluative Sciences, G1 06, 2075 Bayview Ave, Toronto, ON, Canada, M4N 3M5  
19

20 <sup>2</sup>Institute of Health, Policy, Management, and Evaluation, University of Toronto, 4<sup>th</sup> floor, 155 College  
21 St, Toronto, ON, Canada, M5T 3M6  
22

23 <sup>3</sup>Dalla Lana School of Public Health, University of Toronto, 155 College Street, Toronto, ON M5T 3M7  
24

25 <sup>4</sup>Public Health Ontario, 480 University Ave., Suite 300, Toronto ON M5G 1V2  
26  
27  
28

29 Corresponding Author:  
30

31 Jeffrey C. Kwong  
32

33 Institute for Clinical Evaluative Sciences  
34

35 G1 06, 2075 Bayview Ave  
36

37 Toronto, ON, Canada  
38

39 M4N 3M5  
40

41 [jeff.kwong@utoronto.ca](mailto:jeff.kwong@utoronto.ca)  
42  
43

44 **Keywords:** Influenza immunization; Validation; Physician billings  
45  
46  
47

48 **Abbreviations:** OHIP=Ontario Health Insurance Plan; CCHS=Canadian Community Health Survey;  
49

50 ICES=Institute for Clinical Evaluative Sciences; PPV=positive predictive value; NPV=negative  
51

52 predictive value; CIHI=Canadian Institute for Health Information; DAD=Discharge Abstract Database;  
53  
54

1  
2  
3  
4  
5  
6  
7  
8  
9  
10  
11  
12  
13  
14  
15  
16  
17  
18  
19  
20  
21  
22  
23  
24  
25  
26  
27  
28  
29  
30  
31  
32  
33  
34  
35  
36  
37  
38  
39  
40  
41  
42  
43  
44  
45  
46  
47  
48  
49  
50  
51  
52  
53  
54  
55  
56  
57  
58  
59  
60

NACRS=National Ambulatory Care Reporting System; SDS=Same Day Surgery; CORR=Canadian  
Organ Replacement Register; ORRS=Ontario Renal Reporting System; ODD=Ontario Diabetes  
Database; OCR=Ontario Cancer Registry; OMID=Ontario Myocardial Infarction Database;  
COPD=Chronic Obstructive Pulmonary Disease; ODB=Ontario Drug Benefits; CHF=Congestive Heart  
Failure; HIV=Human Immunodeficiency Virus

Abstract word count: ~~25048~~  
Manuscript word count: ~~2543336~~

Confidential

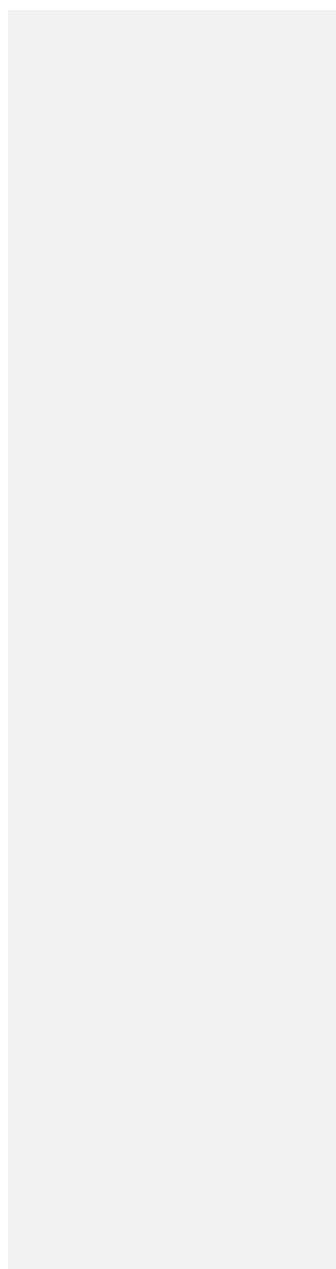

## Abstract

### Background

Due to the absence of an immunization registry in Ontario, administrative data are currently the best available data source to ascertain population-based individual-level influenza immunization status. Our objective was to validate physician billing claims for influenza immunization in the Ontario Health Insurance Plan database against the Canadian Community Health Survey.

### Methods

We used self-reported seasonal influenza immunization status of Ontario residents surveyed between 2007 and 2009 as the reference standard. The survey responses were linked to physician claims database records to validate billing codes for influenza immunization. We calculated sensitivity, specificity, positive predictive value, and negative predictive value with 95% confidence intervals. We stratified the data by a number of covariates and comorbidities to determine stratum-specific performance characteristics. We used these estimates to adjust recent estimates of influenza vaccine effectiveness for the 2010-11 influenza season.

### Results

For the 47,301 individuals included in the analysis, the sensitivity for the billing codes was 49.8% (95%CI 49.0%-50.5%), specificity 95.7% (95%CI 95.5%-96.0%), positive predictive value 88.4% (95%CI 87.8%-89.0%), and negative predictive value 74.5% (95%CI 74.0%-74.9%). Performance measures were optimized in those  $\geq 65$  years of age, particularly those with comorbidities.

### Interpretation

Although administrative data have limitations for ascertaining influenza immunization status, due to the high positive predictive value they are well suited for self-controlled study designs which are often used to assess vaccine safety. For studies of coverage and effectiveness, restricting the cohort to those aged  $\geq 65$  years will minimize misclassification bias. Performance characteristics from this study can be used to mitigate misclassification bias in future studies.

## Introduction

Influenza continues to pose a major public health burden in Canada. It is estimated that 5–10% of the population has a symptomatic influenza infection annually.(1) Since 2000, the province of Ontario has offered free influenza vaccines to the entire population aged  $\geq 6$  months through a variety of settings, including physician offices, community-based public health clinics, healthcare facilities, workplaces, schools, and pharmacies. However, the absence of a comprehensive immunization registry that captures influenza vaccines delivered in all settings has hindered efforts to evaluate the influenza immunization program in terms of vaccine safety, effectiveness, and coverage.

We previously validated physician billing claims for influenza immunization submitted to the Ontario Health Insurance Plan (OHIP) against self-reported influenza immunization from the Canadian Community Health Survey (CCHS) cycle 1.1, conducted in 2000:01.(2) We found high specificity (97%) and positive predictive value (PPV; 91%), moderately high negative predictive value (NPV; 79%), but lower sensitivity (56%). Sensitivity was higher for adults aged  $\geq 65$  years and individuals who reported having chronic medical conditions. Previous studies have found self-reported immunization status to be valid.(3–10) The low sensitivity of physician billing claims is partially explained by individuals receiving influenza vaccines outside of physician offices.(2) The objective of this study was to update the previous validation with more recent data, and to estimate performance measures of OHIP billing claims for individuals with a more comprehensive (and more rigorously ascertained) list of risk factors for serious influenza infections.

## Methods

### Study population and setting

This study included Ontario residents who responded to the CCHS between 1 January 2007 and 30 September 2009 and agreed to have their survey data linked with provincial health administrative data. These datasets were linked using unique encoded identifiers and analyzed at the Institute for Clinical

1  
2  
3  
4  
5  
6  
7  
8 Evaluative Sciences (ICES). We excluded those surveyed on 1 October 2009 or later because two  
9  
10 vaccines were used during the 2009-10 influenza season (the monovalent pandemic A/H1N1 vaccine  
11  
12 and the trivalent seasonal influenza vaccine) and we were unable to differentiate [between](#) them using the  
13  
14 OHIP data because the same billing codes were used for both vaccines. Data from more recent cycles of  
15  
16 CCHS were not yet available in linked format at ICES [at the times](#) of [manuscript submission in](#) January  
17  
18 2016. This study was approved by the institutional review board at Sunnybrook Health Sciences Centre,  
19  
20 Toronto, Canada.

## 21 22 23 Data Sources

### 24 Canadian Community Health Survey

25  
26 The CCHS is a national cross-sectional survey that collects health-related information on individuals  
27  
28 aged  $\geq 12$  years through telephone and in-person interviews. The first three iterations in 2000-01 (CCHS  
29  
30 1.1), 2003 (CCHS 2.1), and 2005 (CCHS 3.1) were biennial surveys of approximately 130,000  
31  
32 respondents. In 2007, Statistics Canada changed the survey design so that data would be collected from  
33  
34 approximately 65,000 respondents annually. The survey excludes persons residing on aboriginal  
35  
36 settlements, full-time members of the Canadian armed forces, and institutionalized individuals (less than  
37  
38 3% of total population). Details of the survey methodology have been described elsewhere.<sup>(11)</sup> The  
39  
40 response rates for the 2007-08 and 2009-10 cycles were 77.6%, and 73.2%, respectively. The linkage  
41  
42 rate between CCHS and ICES data was 83%.

### 43 44 Ontario Health Insurance Plan

45  
46 The OHIP database contains billing information from approximately 94% of Ontario's physicians.<sup>(12)</sup> It  
47  
48 excludes those not paid through fee-for-service methods. OHIP provides virtually the entire Ontario  
49  
50 population with universal insurance coverage for physician services and hospital care, excluding new  
51  
52 provincial residents during their initial three months.

1  
2  
3  
4  
5  
6  
7  
8  
9  
10  
11  
12  
13  
14  
15  
16  
17  
18  
19  
20  
21  
22  
23  
24  
25  
26  
27  
28  
29  
30  
31  
32  
33  
34  
35  
36  
37  
38  
39  
40  
41  
42  
43  
44  
45  
46  
47  
48  
49  
50  
51  
52  
53  
54  
55  
56  
57  
58  
59  
60

## Definitions

### Influenza immunization status from CCHS

Respondents were asked, "Have you ever had a flu shot?" Those who responded affirmatively were asked, "When did you have your last flu shot?" Respondents specifying they had received a flu shot within the last 12 months were then asked which month, and if they answered the current month they were asked, "Was that this year or last year?" We classified the following individuals who reported receiving a flu shot within the last 12 months as immunized: 1) those whose month of immunization differed from the month of interview; and 2) those whose month of immunization matched the month of interview, and it was this year. Since the questionnaire did not ascertain the exact date of flu shot receipt, individuals whose month of immunization matched the month of interview, but it was last year, may have received their influenza vaccine more than 365 days prior. For these specific individuals, we classified individuals whose interview occurred during the first 15 days of the month as having been immunized and those interviewed after the first 15 days of the month as not immunized. We conducted a sensitivity analysis restricting the survey dates from 1 February to 31 August of each year in order to minimize the risk of immunization year misclassification for those surveyed during influenza immunization campaign periods in Ontario (usually September to January).

### Influenza immunization status from OHIP

To identify influenza immunization status in the OHIP database, we used the billing codes for immunization with influenza vaccines, G590 (influenza immunization plus visit) and G591 (influenza immunization only). We also included the tracking code Q130 (influenza vaccine tracking code), which is used when a patient has been immunized elsewhere. Physicians belonging to certain remuneration plans receive financial incentives for attaining pre-specified targets for influenza immunization of their patients aged  $\geq 65$  years, and all three codes are included in the numerator for those calculations. Using

1  
2  
3  
4  
5  
6  
7  
8 the CCHS interview date as the reference date, we considered the presence of any of the influenza  
9 immunization codes over the previous 365 days to be active immunization.  
10  
11  
12

#### 13 Other Definitions 14

15 We ascertained neighbourhood income quintile using residential postal codes, and defined rural  
16 residence as community size <10,000 residents. Having a regular physician was determined from the  
17 CCHS question, "Do you have a regular medical doctor?" We evaluated individuals for the presence of  
18 a number of potential risk factors for serious influenza infections, including chronic cardiovascular  
19 diseases (congestive heart failure, history of acute myocardial infarction or acute ischemic stroke, and  
20 hypertension), chronic respiratory diseases (asthma and chronic obstructive pulmonary disease),  
21 diabetes, chronic kidney disease, cancer, immunosuppression (resulting from infection with human  
22 immunodeficiency virus or from immunosuppressive therapies), dementia, morbid obesity (body mass  
23 index >40 calculated from the height and weight provided in the CCHS survey), and pregnancy (derived  
24 from the MOMBABY database). Most of these conditions were defined using previously validated  
25 algorithms applied to administrative datasets housed at ICES, including the OHIP database, the  
26 Canadian Institute for Health Information (CIHI) Discharge Abstract Database (DAD), the CIHI  
27 National Ambulatory Care Reporting System (NACRS), the CIHI Same Day Surgery (SDS) database,  
28 the Canadian Organ Replacement Register (CORR), the Ontario Renal Reporting System (ORRS), the  
29 Ontario Diabetes Database (ODD), the Ontario Cancer Registry (OCR), the Ontario Myocardial  
30 Infarction Database (OMID), the Chronic Obstructive Pulmonary Disease (COPD) database, the Ontario  
31 Drug Benefits (ODB) database, the Ontario Congestive Heart Failure (CHF) database, and the Ontario  
32 Human Immunodeficiency Virus (HIV) database.(13:28) These databases and the definitions used are  
33 described in the appendix tables e1 and e2.  
34  
35  
36  
37  
38  
39  
40  
41  
42  
43  
44  
45  
46  
47  
48  
49  
50

#### 51 Statistical analysis 52

53  
54 | 7  
55  
56  
57  
58  
59  
60

We set self-reported influenza immunization status from the CCHS as the reference standard. We calculated performance measures (sensitivity, specificity, PPV, and NPV) with 95% confidence limits for OHIP physician billing claims for influenza immunization. We stratified the results by survey cycle, age group, sex, rural versus urban residence, having a regular physician, and presence of risk factors for serious influenza infections. We further stratified some of these groups by age (<65 years versus ≥65 years). Statistical analyses were conducted using SAS Enterprise Guide 6.1 (SAS Institute Inc., Cary, NC).

#### Application example

Formatted: Font: Italic

To illustrate the applicability of these results, we used the values for sensitivity and specificity to correct the bias arising from misclassification of influenza immunization status based on OHIP physician billing claims. ~~We by applying a SAS macro developed by Fox et al. (29) to results from a previous influenza vaccine effectiveness study by Kwong et al. that assessed vaccine effectiveness against laboratory-confirmed influenza hospitalizations amongst older adults during the 2010-11 influenza season. (30) This macro uses a probabilistic method for conducting a sensitivity analysis using individual level data. Using the overall and incorporates the sensitivity and specificity from this study's results for influenza immunization status in Ontario individuals aged ≥65 years, we calculated vaccine effectiveness of the misclassified variable to produce odds ratio estimates that are corrected for the misclassification bias of the exposure variable (i.e., influenza immunization). (29) We assumed the bias was non-differential (i.e., that the exposure bias was not related to the outcome).~~ Statistical analyses were conducted using SAS Enterprise Guide 6.1 (SAS Institute Inc., Cary, NC).

#### Results

There were 48,426 survey responses, with 1,122 excluded for either refusal or an inability to answer the influenza vaccine question and 3 excluded with invalid birthdates, leaving 47,301 Ontarians included in



1  
2  
3  
4  
5  
6  
7  
8 the analysis (Table 1). Based on CCHS survey results, approximately 40% of these individuals reported  
9 being immunized against influenza, ranging from less than 25% in those aged <50 years to 68% of those  
10 aged ≥65 years. Immunization coverage was higher among females, older adults, those with a regular  
11 physician, and those with risk factors for serious influenza infection, except for pregnancy.  
12  
13  
14

15 The combined sensitivity for influenza OHIP billing codes was 49.8% (95%CI 49.0%–50.5%),  
16 specificity 95.7% (95%CI 95.5%–96.0%), positive predictive value 88.4% (95%CI 87.8%–89.0%), and  
17 negative predictive value 74.5% (95%CI 74.0%–74.9%) (Table 2). The sensitivity ranged from 20.3% in  
18 adolescents (12–17 years) to 68.9% in those aged ≥65 years, whereas specificity was high for those <65  
19 years of age (≥96.0%) and declined to 82.7% for those aged ≥65 years. Similarly, PPV increased with  
20 age whereas NPV decreased.  
21  
22  
23  
24  
25  
26

27 Having access to a regular physician substantially improved the sensitivity of OHIP influenza  
28 vaccine billing codes, but with some decrease in specificity. The validity of the OHIP influenza  
29 immunization codes was fairly consistent across a variety of influenza risk factors, as long as the cohort  
30 was restricted to those ≥65 years of age. For chronic conditions, the sensitivity ranged from 68.9% to  
31 74.3% and dropped to 60.5% in those without any comorbidities. The specificity ranged from 73.8% to  
32 90.0%. The sensitivity decreased for all conditions to 40.4%–57.4% in those <65 years of age, but  
33 remained significantly higher than for younger individuals without any comorbidities (29.1%). The  
34 specificity was high across all comorbid conditions in the younger cohort. The PPV was high for all  
35 groups except those aged 12–17 years.  
36  
37  
38  
39  
40  
41  
42

43 In the sensitivity analysis restricting to those who were surveyed between February and August,  
44 the overall PPV increased from 88.4% to 93.2% and the specificity increased marginally from 95.7% to  
45 97.5% (Table 3). The improvements in both specificity and PPV were seen in all subgroups. Results for  
46 individuals aged <65 years who have risk factors for serious influenza infection are not presented due to  
47 the presence of numerous small cells (i.e., cell size <6 individuals).  
48  
49  
50  
51  
52  
53  
54  
55  
56  
57  
58  
59  
60

1  
2  
3  
4  
5  
6  
7  
8 We incorporated our results into a misclassification bias adjustment sensitivity analysis to  
9 demonstrate the utility of these results when using administrative data for ascertaining individual level  
10 influenza immunization status for vaccine effectiveness studies. In our analysis accounting for the  
11 misclassification bias from using OHIP physician billing claims to ascertain influenza immunization  
12 status in Ontario, we inputted a sensitivity of 68.6% and a specificity of 89.9% (from Table 3). Figure  
13 1 shows a significant underestimation of influenza vaccine effectiveness for the 2010-11 season before  
14 adjusting for the misclassification of immunization status, and observed an increase in vaccine  
15 effectiveness increased from 42% (95%CI 29%-53%) to 68% (95%CI 61%-78%) after the adjustment,  
16 suggesting a significant underestimation of vaccine effectiveness in the original study (Figure).  
17  
18  
19  
20  
21  
22  
23  
24

#### 25 Interpretation

26 We found that OHIP billing claims had only moderate performance characteristics to correctly identify  
27 influenza immunization status in Ontario, compared to self-report. For children and adults <65 years of  
28 age, the sensitivity was under 50%, but specificity was greater than 90%. Among those aged ≥65 years,  
29 the sensitivity was 70%, but with 83% specificity. The sensitivity was generally higher for those with  
30 comorbid conditions and those with a regular physician. These subpopulations had the most accurate  
31 OHIP influenza immunization billing claims. The performance characteristics were better when  
32 restricting to CCHS respondents who were surveyed between February and August, suggesting the  
33 presence of some misclassification by influenza season when including CCHS respondents surveyed  
34 during months that influenza vaccines are generally given.  
35  
36  
37  
38  
39  
40  
41  
42  
43  
44

45 There are a number of potential explanations for the low sensitivity of OHIP billing claims. A  
46 significant minority of individuals are immunized outside of physician offices and we would not expect  
47 their immunizations to be captured in health administrative data, despite the existence of an influenza  
48 vaccine tracking code. These include persons immunized at workplaces, schools, or public health  
49 clinics. In 2012, pharmacists began providing immunizations and these are captured in the ODB  
50  
51  
52  
53

1  
2  
3  
4  
5  
6  
7  
8 database, which may improve the performance of Ontario administrative data during subsequent years.

9  
10 In addition, remuneration per immunization is low (ranging from \$0.68 to \$9.60 depending on the  
11 family practice funding model), possibly resulting in missed billings.

12  
13 The lower specificity in the elderly population is more difficult to explain. It is possible that  
14 proportionally more elderly individuals forget while responding to the CCHS that they had received the  
15 influenza immunization that year. However, previous studies have found self-reported influenza  
16 immunization status to be reasonably ~~accurate~~ valid (3-9). Alternatively, billing errors or medical fraud  
17 could explain a proportion of the false positive results.

18  
19 This study has a few limitations. The CCHS excludes children younger than 12 years and  
20 institutionalized seniors. These are important high risk groups to study and it is unfortunate that we are  
21 unable to quantify the validity of influenza immunization in these groups. However, our study does  
22 characterize the validity of influenza immunization, as captured by administrative data, in virtually all  
23 other high risk groups. We ~~utilized used survey self report responses~~ as the ~~reference performance~~  
24 standard in this analysis, and ~~while~~ verification of responses ~~accuracy~~ was not possible. ~~previous studies~~  
25 ~~have shown population surveys eight prior validation studies comparing self report to medical records~~  
26 ~~suggest that sensitivity of self report is high (86% 100%) and both specificity and PPV are more~~  
27 ~~variable, but are generally lower (38% 98% and 62% 96%, respectively).~~ (3-10) However, the  
28 ~~specificity and PPV of self report may be artificially reduced when using medical records as the~~  
29 ~~reference standard if individuals can receive influenza immunization through alternative vaccine~~  
30 ~~providers (e.g., workplaces, pharmacies) in ascertaining influenza immunization status to accurate.~~ (3-6)

31  
32 This study updates the performance characteristics from our previous study (2) with a much  
33 larger sample size, more recent iterations of the CCHS, and a far more extensive list of risk factors for  
34 serious influenza infection defined using validated methods. We quantified the sensitivity, specificity,  
35 PPV, and NPV across a variety of variables including multiple high risk influenza groups. These results  
36 can be used to ~~adjust correct~~ for ~~underascertainment of vaccine coverage levels at the aggregate level.~~

1  
2  
3  
4  
5  
6  
7  
8  
9  
10  
11  
12  
13  
14  
15  
16  
17  
18  
19  
20  
21  
22  
23  
24  
25  
26  
27  
28  
29  
30  
31  
32  
33  
34  
35  
36  
37  
38  
39  
40  
41  
42  
43  
44  
45  
46  
47  
48  
49  
50  
51  
52  
53  
54  
55  
56  
57  
58  
59  
60

and to account for misclassification bias of influenza immunization status at the individual level (e.g., in studies of influenza vaccine effectiveness). We demonstrated the importance of quantifying misclassification bias, with significant underestimation of influenza vaccine effectiveness when utilizing OHIP physician billing claims data to ascertain influenza immunization status. Non-differential misclassification is generally expected to bias results toward the null hypothesis and thus underestimate effect sizes. However, this may not always be true; therefore it is important to quantify the degree of systematic error in observational studies.(29) In addition, the high PPV and specificity suggests the database can accurately identify those truly immunized, allowing these data to be used to study influenza vaccine safety using self-controlled study designs.(31)

In the absence of an immunization registry in Ontario, administrative data represent the best available data source to study influenza vaccines on a population level. However, we fully support the creation of an immunization registry in Ontario to permit optimal evaluations of our publicly funded immunization programs, particularly since immunizations given at public health and workplace clinics are not captured by physician billing claims data. Despite the limitations of administrative data, the results of this study identifies important limitations of this data source, but will enable adjustments for systematic error in future studies.

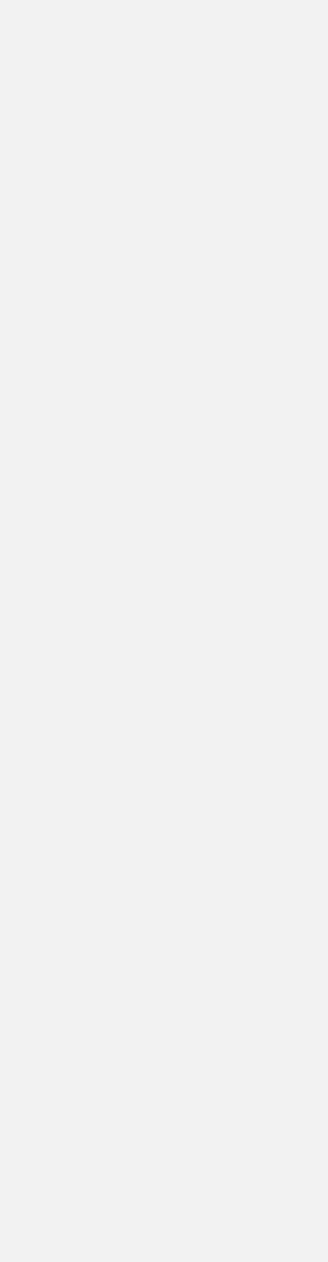

1  
2  
3  
4  
5  
6  
7  
8 Conflicts of interest: none  
9

10  
11 Contributors: All authors contributed substantially to the conception, design, data analysis plan, and  
12 interpretation of the data. In addition, NJ performed the data analysis and KLS drafted the manuscript.  
13  
14 All authors critically reviewed the manuscript for important intellectual content and approved the final  
15 version to be published.  
16  
17

#### 21 Acknowledgments

22 This work was supported the Canadian Institutes of Health Research (CIHR) (grant no. MOP 130568).  
23  
24 This study was also supported by the Institute for Clinical Evaluative Sciences (ICES) which is funded  
25 by annual grants from the Ontario Ministry of Health and Long Term Care (MOHLTC). KS is supported  
26 by a Fellowship Award from CIHR. JCK is supported by a New Investigator Award from CIHR and a  
27 Clinician Scientist Award from the University of Toronto DFCM. The study sponsors did not participate  
28 in: the design and conduct of the study; collection, management, analysis and interpretation of the data;  
29 preparation, review or approval of the manuscript; or the decision to submit the manuscript for  
30 publication. Parts of this material are based on data and information compiled and provided by the  
31 Canadian Institute for Health Information (CIHI) and Cancer Care Ontario (CCO). However, the  
32 analyses, conclusions, opinions and statements expressed herein are those of the authors, and not  
33 necessarily those of CIHI or CCO.  
34  
35  
36  
37  
38  
39  
40  
41  
42  
43  
44

#### 45 Disclaimer

46 The opinions, results and conclusions reported in this paper are those of the authors and are independent  
47 from the funding sources. No endorsement by ICES or MOHLTC is intended or should be inferred.  
48  
49  
50  
51  
52  
53

## References

1. Kuster SP, Shah PS, Coleman BL, Lam PP, Tong A, Wormsbecker A, et al. Incidence of influenza in healthy adults and healthcare workers: a systematic review and meta-analysis. *PLoS ONE*. 2011;6(10):e26239.
2. Kwong JC, Manuel DG. Using OHIP physician billing claims to ascertain individual influenza vaccination status. *Vaccine*. 2007 Jan 26;25(7):1270-4.
3. Hutchison BG. Measurement of influenza vaccination status of the elderly by mailed questionnaire: response rate, validity and cost. *Can J Public Health*. 1989 Jul-Aug;80(4):271-5.
4. MacDonald R, Baken L, Nelson A, Nichol KL. Validation of self-report of influenza and pneumococcal vaccination status in elderly outpatients. *Am J Prev Med*. 1999 Apr;16(3):173-7.
5. Martin LM, Leff M, Calonge N, Garrett C, Nelson DE. Validation of self-reported chronic conditions and health services in a managed care population. *Am J Prev Med*. 2000 Apr;18(3):215-8.
6. Zimmerman RK, Raymond M, Janosky JE, Nowalk MP, Fine MJ. Sensitivity and specificity of patient self-report of influenza and pneumococcal polysaccharide vaccinations among elderly outpatients in diverse patient care strata. *Vaccine*. 2003 Mar 28;21(13-14):1486-91.
7. Skull SA, Andrews RM, Byrnes GB, Kelly HA, Nolan TM, Brown GV, et al. Validity of self-reported influenza and pneumococcal vaccination status among a cohort of hospitalized elderly inpatients. *Vaccine*. 2007 Jun 15;25(25):4775-83.
8. Rolnick SJ, Parker ED, Nordin JD, Hedblom BD, Wei F, Kerby T, et al. Self-report compared to electronic medical record across eight adult vaccines: do results vary by demographic factors? *Vaccine*. 2013 Aug 20;31(37):3928-35.
9. Mangtani P, Shah A, Roberts JA. Validation of influenza and pneumococcal vaccine status in adults based on self-report. *Epidemiol Infect*. 2007 Jan;135(1):139-43.
10. Irving SA, Donahue JG, Shay DK, Ellis-Coyle TL, Belongia EA. Evaluation of self-reported and registry-based influenza vaccination status in a Wisconsin cohort. *Vaccine*. 2009 Nov 5;27(47):6546-9.
11. Beland Y. Canadian community health survey--methodological overview. *Health Rep*. 2002;13(3):9-14.
12. Chan B. Supply of physicians' services in Ontario. *Hosp Q*. 1999 Winter;3(2):17.
13. Fleet JL, Dixon SN, Shariff SZ, Quinn RR, Nash DM, Harel Z, et al. Detecting chronic kidney disease in population-based administrative databases using an algorithm of hospital encounter and physician claim codes. *BMC Nephrol*. 2013;14:81.
14. Quinn RR, Laupacis A, Austin PC, Hux JE, Garg AX, Hemmelgarn BR, et al. Using administrative datasets to study outcomes in dialysis patients: a validation study. *Medical care*. 2010 Aug;48(8):745-50.
15. Lam NN ME, Kim SJ and Knoll GA. Validation of Kidney Transplantation Using Administrative Data. *Canadian Journal of Kidney Health and Disease*. 2015.
16. Hux JE, Ivis F, Flintoft V, Bica A. Diabetes in Ontario: determination of prevalence and incidence using a validated administrative data algorithm. *Diabetes care*. 2002 Mar;25(3):512-6.
17. Starfield B, Weiner J, Mumford L, Steinwachs D. Ambulatory care groups: a categorization of diagnoses for research and management. *Health services research*. 1991 Apr;26(1):53-74.
18. Hall S, Schulze K, Groome P, Mackillop W, Holowaty E. Using cancer registry data for survival studies: the example of the Ontario Cancer Registry. *J Clin Epidemiol*. 2006 Jan;59(1):67-76.

19. Austin PC, Daly PA, Tu JV. A multicenter study of the coding accuracy of hospital discharge administrative data for patients admitted to cardiac care units in Ontario. *Am Heart J*. 2002 Aug;144(2):290-6.
20. Schultz SE, Rothwell DM, Chen Z, Tu K. Identifying cases of congestive heart failure from administrative data: a validation study using primary care patient records. *Chronic diseases and injuries in Canada*. 2013 Jun;33(3):160-6.
21. Gill SS, Anderson GM, Fischer HD, Bell CM, Li P, Normand SL, et al. Syncope and its consequences in patients with dementia receiving cholinesterase inhibitors: a population-based cohort study. *Archives of internal medicine*. 2009 May 11;169(9):867-73.
22. Jurlink DN. Canadian institute for health information discharge abstract database: a validation study. *Institute for Clinical Evaluative Sciences*; 2006.
23. Gurevich Y, McFarlane A, Morris K, Jbkovic A, Peterson GM, Webster GK. Estimating the number of coronary artery bypass graft and percutaneous coronary intervention procedures in Canada: a comparison of cardiac registry and Canadian Institute for Health Information data sources. *Can J Cardiol*. 2010 Aug-Sep;26(7):e249-53.
24. Lee DS, Tu JV, Austin PC, Dorian P, Yee R, Chong A, et al. Effect of cardiac and noncardiac conditions on survival after defibrillator implantation. *J Am Coll Cardiol*. 2007 Jun 26;49(25):2408-15.
25. Gershon AS, Wang C, Guan J, Vasilevska-Ristovska J, Cutto L, To T. Identifying patients with physician-diagnosed asthma in health administrative databases. *Can Respir J*. 2009 Nov-Dec;16(6):183-8.
26. Gershon AS, Wang C, Guan J, Vasilevska-Ristovska J, Cutto L, To T. Identifying individuals with physician diagnosed COPD in health administrative databases. *Copd*. 2009 Oct;6(5):388-94.
27. Bronskill S. Personal communication regarding dementia algorithm.
28. Antoniou T, Zagorski B, Loutfy MR, Strike C, Glazier RH. Validation of case-finding algorithms derived from administrative data for identifying adults living with human immunodeficiency virus infection. *PLoS One*. 2011;6(6):e21748.
29. Fox MP, Lash TL, Greenland S. A method to automate probabilistic sensitivity analyses of misclassified binary variables. *Int J Epidemiol*. 2005 Dec;34(6):1370-6.
30. Kwong JC, Campitelli MA, Gubbay JB, Peci A, Winter A-L, Olisha R, et al. Vaccine effectiveness against laboratory-confirmed influenza hospitalizations among elderly adults during the 2010-2011 season. *Clinical Infectious Diseases*. [Research Support, Non-U.S. Gov't]. 2013 Sep;57(6):820-7.
31. Kwong JC, Vasa PP, Campitelli MA, Hawken S, Wilson K, Rosella LC, et al. Risk of Guillain-Barre syndrome after seasonal influenza vaccination and influenza health-care encounters: a self-controlled study. *Lancet Infect Dis*. 2013 Sep;13(9):769-76.

Table 1. Demographic characteristics of the study population and percentage receiving influenza immunization within the past 12 months

|                                                            | N (%)          | % immunized |
|------------------------------------------------------------|----------------|-------------|
| Total                                                      | 47,301 (100.0) | 39.5        |
| OCHScycle                                                  |                |             |
| 2007-2008                                                  | 33,840 (71.5)  | 38.9        |
| 2009-2010                                                  | 13,461 (28.5)  | 41.1        |
| Sex                                                        |                |             |
| Female                                                     | 25,904 (54.8)  | 42.4        |
| Male                                                       | 21,397 (45.2)  | 36.1        |
| Age group                                                  |                |             |
| 12-17 years                                                | 4,071 (8.6)    | 24.8        |
| 18-49 years                                                | 20,247 (42.8)  | 23.6        |
| 50-64 years                                                | 11,815 (25.0)  | 44.6        |
| ≥65 years                                                  | 11,168 (23.6)  | 68.4        |
| Rurality <sup>a</sup>                                      |                |             |
| Urban                                                      | 37,406 (79.1)  | 39.3        |
| Rural                                                      | 9,802 (20.7)   | 40.4        |
| Neighbourhood income quintile <sup>b</sup>                 |                |             |
| 1 (lowest)                                                 | 9,342 (19.7)   | 40.3        |
| 2                                                          | 9,402 (19.9)   | 39.6        |
| 3                                                          | 9,467 (20.0)   | 39.5        |
| 4                                                          | 9,568 (20.2)   | 38.7        |
| 5 (highest)                                                | 9,330 (19.7)   | 39.7        |
| Has regular doctor                                         |                |             |
| Yes                                                        | 43,110 (91.1)  | 41.3        |
| No                                                         | 4,191 (8.9)    | 21.7        |
| Risk factors for serious influenza infections <sup>c</sup> |                |             |
| Hypertension                                               | 13,826 (29.2)  | 61.7        |
| Asthma                                                     | 6,225 (13.2)   | 44.0        |
| Diabetes                                                   | 4,877 (10.3)   | 63.7        |
| Cancer                                                     | 2,572 (5.4)    | 64.4        |
| Chronic obstructive pulmonary disease                      | 1,596 (3.4)    | 70.5        |
| Congestive heart failure                                   | 1,235 (2.6)    | 74.0        |
| Myocardial infarction                                      | 928 (2.0)      | 69.6        |
| Chronic kidney disease                                     | 886 (1.9)      | 68.9        |
| Morbid obesity <sup>d</sup>                                | 866 (1.8)      | 43.7        |
| Stroke                                                     | 861 (1.8)      | 66.0        |
| Immunosuppression                                          | 679 (1.4)      | 74.7        |
| Pregnancy <sup>e</sup>                                     | 512 (1.1)      | 18.0        |
| Dementia                                                   | 245 (0.5)      | 64.5        |
| None of the above risk factors                             | 25,924 (54.8)  | 27.3        |

<sup>a</sup>95 missing

<sup>b</sup>192 missing

<sup>c</sup>Percentages add up to more than 100% because individuals may have more than one risk factor

<sup>d</sup>Body mass index >40

<sup>e</sup>Date of delivery between 1 November and 1 June

Formatted: Superscript

Formatted: Superscript



1  
2  
3  
4  
5  
6  
7  
8  
9  
10  
11  
12  
13  
14  
15  
16  
17  
18  
19  
20  
21  
22  
23  
24  
25  
26  
27  
28  
29  
30  
31  
32  
33  
34  
35  
36  
37  
38  
39  
40  
41  
42  
43  
44  
45  
46  
47  
48  
49

Table 2. Performance measures of Ontario Health Insurance Plan physician billing claims compared to self-reported influenza immunization using Canadian Community Health Survey data

|                                           | TP    | FP    | FN    | TN     | Sensitivity (95% CI) | Specificity (95% CI) | PPV (95% CI)     | NPV (95% CI)     |
|-------------------------------------------|-------|-------|-------|--------|----------------------|----------------------|------------------|------------------|
| Total                                     | 9,303 | 1,218 | 9,395 | 27,385 | 49.8 (49.0-50.5)     | 95.7 (95.5-96.0)     | 88.4 (87.8-89.0) | 74.5 (74.0-74.9) |
| OCHS survey cycle                         |       |       |       |        |                      |                      |                  |                  |
| 2007-08                                   | 6,506 | 1,023 | 6,666 | 19,645 | 49.4 (48.5-50.2)     | 95.1 (94.8-95.3)     | 86.4 (85.6-87.2) | 74.7 (74.1-75.2) |
| 2009-10                                   | 2,797 | 195   | 2,729 | 7,740  | 50.6 (49.3-51.9)     | 97.5 (97.2-97.9)     | 93.5 (92.6-94.4) | 73.9 (73.1-74.8) |
| Age group                                 |       |       |       |        |                      |                      |                  |                  |
| 12-17 years                               | 205   | 71    | 803   | 2,992  | 20.3 (17.9-22.8)     | 97.7 (97.1-98.2)     | 74.3 (69.1-79.4) | 78.8 (77.5-80.1) |
| 18-49 years                               | 1,510 | 275   | 3,272 | 15,190 | 31.6 (30.3-32.9)     | 98.2 (98.0-98.4)     | 84.6 (82.9-86.3) | 82.3 (81.7-82.8) |
| 50-64 years                               | 2,319 | 263   | 2,947 | 6,285  | 44.0 (42.7-45.4)     | 96.0 (95.5-96.5)     | 89.8 (88.6-91.0) | 68.1 (67.1-69.0) |
| ≥65 years                                 | 5,269 | 609   | 2,373 | 2,918  | 68.9 (67.9-70.0)     | 82.7 (81.5-84.0)     | 89.6 (88.9-90.4) | 55.2 (53.8-56.5) |
| Sex                                       |       |       |       |        |                      |                      |                  |                  |
| Female                                    | 5,536 | 708   | 5,448 | 14,211 | 50.4 (49.5-51.3)     | 95.3 (94.9-95.6)     | 88.7 (87.9-89.4) | 72.3 (71.7-72.9) |
| Male                                      | 3,767 | 510   | 3,947 | 13,174 | 48.8 (47.7-49.9)     | 96.3 (96.0-96.6)     | 88.1 (87.1-89.0) | 76.9 (76.3-77.6) |
| Rural                                     |       |       |       |        |                      |                      |                  |                  |
| Urban                                     | 7,474 | 1,016 | 7,229 | 21,687 | 50.8 (50.0-51.6)     | 95.5 (95.3-95.8)     | 88.0 (87.3-88.7) | 75.0 (74.5-75.5) |
| Rural                                     | 1,812 | 201   | 2,152 | 5,638  | 45.7 (44.2-47.3)     | 96.6 (96.1-97.0)     | 90.0 (88.7-91.3) | 72.4 (71.4-73.4) |
| Has a regular doctor                      |       |       |       |        |                      |                      |                  |                  |
| Yes (<65 years)                           | 3,924 | 585   | 6,430 | 21,505 | 37.9 (37.0-38.8)     | 97.4 (97.1-97.6)     | 87.0 (86.0-88.0) | 77.0 (76.5-77.5) |
| Yes (≥65 years)                           | 5,205 | 600   | 2,229 | 2,632  | 70.0 (69.0-71.1)     | 81.4 (80.1-82.8)     | 89.7 (88.9-90.4) | 54.1 (52.7-55.5) |
| No (<65 years)                            | 110   | 24    | 592   | 2,962  | 15.7 (13.0-18.4)     | 99.2 (98.9-99.5)     | 82.1 (75.6-88.6) | 83.3 (82.1-84.6) |
| No (≥65 years)                            | 64    | 9     | 144   | 286    | 30.8 (24.5-37.0)     | 96.9 (95.0-98.9)     | 87.7 (80.1-95.2) | 66.5 (62.1-71.0) |
| Risk factors for serious influenza (≥65y) |       |       |       |        |                      |                      |                  |                  |
| Hypertension                              | 4,012 | 448   | 1,589 | 1,671  | 71.6 (70.4-72.8)     | 78.9 (77.1-80.6)     | 90.0 (89.1-90.8) | 51.3 (49.5-53.0) |
| Asthma                                    | 651   | 63    | 270   | 244    | 70.7 (67.7-73.6)     | 79.5 (75.0-84.0)     | 91.2 (89.1-93.3) | 47.5 (43.2-51.8) |
| Diabetes                                  | 1,340 | 159   | 544   | 554    | 71.1 (69.1-73.2)     | 77.7 (74.6-80.8)     | 89.4 (87.8-91.0) | 50.5 (47.5-53.4) |
| Cancer                                    | 858   | 81    | 342   | 359    | 71.5 (68.9-74.1)     | 81.6 (78.0-85.2)     | 91.4 (89.6-93.2) | 51.2 (47.5-54.9) |
| COPD                                      | 586   | 55    | 265   | 234    | 68.9 (65.7-72.0)     | 81.0 (76.4-85.5)     | 91.4 (89.3-93.6) | 46.9 (42.5-51.3) |
| Congestive heart failure                  | 571   | 51    | 202   | 178    | 73.9 (70.8-77.0)     | 77.7 (72.3-83.1)     | 91.8 (89.6-94.0) | 46.8 (41.8-51.9) |
| Myocardial infarction                     | 329   | 34    | 130   | 120    | 71.7 (67.6-75.8)     | 77.9 (71.4-84.5)     | 90.6 (87.6-93.6) | 48.0 (41.8-54.2) |
| Chronic kidney disease                    | 323   | 36    | 134   | 116    | 70.7 (66.5-74.9)     | 76.3 (69.6-83.1)     | 90.0 (86.9-93.1) | 46.4 (40.2-52.6) |
| Morbid obesity <sup>a</sup>               | 67    | <6    | <30   | 45     | 72.0 (62.9-81.2)     | 90.0 (81.7-98.3)     | 93.1 (87.2-98.9) | 63.4 (52.2-74.6) |
| Stroke                                    | 334   | 39    | 124   | 137    | 72.9 (68.9-77.0)     | 77.8 (71.7-84.0)     | 89.5 (86.4-92.6) | 52.5 (46.4-58.5) |
| Immunosuppression                         | 337   | 25    | 133   | 123    | 71.7 (67.6-75.8)     | 83.1 (77.1-89.1)     | 93.1 (90.5-95.7) | 48.0 (41.9-54.2) |
| Dementia                                  | 107   | 21    | 37    | 59     | 74.3 (67.2-81.4)     | 73.8 (64.1-83.4)     | 83.6 (77.2-90.0) | 61.5 (51.7-71.2) |
| No risk factors                           | 733   | 95    | 478   | 856    | 60.5 (57.8-63.3)     | 90.0 (88.1-91.9)     | 88.5 (86.4-90.7) | 64.2 (61.6-66.7) |

1  
2  
3  
4  
5  
6  
7  
8  
9  
10  
11  
12  
13  
14  
15  
16  
17  
18  
19  
20  
21  
22  
23  
24  
25  
26  
27  
28  
29  
30  
31  
32  
33  
34  
35  
36  
37  
38  
39  
40  
41  
42  
43  
44  
45  
46  
47  
48  
49

| Risk factors for serious influenza (<65y) |       |     |       |        |                  |                  |                  |                  |
|-------------------------------------------|-------|-----|-------|--------|------------------|------------------|------------------|------------------|
| Hypertension                              | 1,460 | 176 | 1,471 | 2,999  | 49.8 (48.0-51.6) | 94.5 (93.7-95.3) | 89.2 (87.7-90.7) | 67.1 (65.7-68.5) |
| Asthma                                    | 734   | 87  | 1,084 | 3,092  | 40.4 (38.1-42.6) | 97.3 (96.7-97.8) | 89.4 (87.3-91.5) | 74.0 (72.7-75.4) |
| Diabetes                                  | 649   | 76  | 572   | 983    | 53.2 (50.4-56.0) | 92.8 (91.3-94.4) | 89.5 (87.3-91.7) | 63.2 (60.8-65.6) |
| Cancer                                    | 215   | 19  | 243   | 459    | 46.9 (42.4-51.5) | 96.0 (94.3-97.8) | 91.9 (88.4-95.4) | 65.4 (61.9-68.9) |
| COPD                                      | 152   | 21  | 122   | 161    | 55.5 (49.6-61.4) | 88.5 (83.8-93.1) | 87.9 (83.0-92.7) | 56.9 (51.1-62.7) |
| Congestive heart failure                  | 81    | 11  | 60    | 81     | 57.4 (49.3-65.6) | 88.0 (81.4-94.7) | 88.0 (81.4-94.7) | 57.4 (49.3-65.6) |
| Myocardial infarction                     | 94    | 10  | 93    | 118    | 50.3 (43.1-57.4) | 92.2 (87.5-96.8) | 90.4 (84.7-96.1) | 55.9 (49.2-62.6) |
| Chronic kidney disease                    | 81    | <6  | <75   | 120    | 52.9 (45.0-60.9) | 96.8 (93.7-99.9) | 95.3 (90.9-99.8) | 62.5 (55.7-69.3) |
| Morbid obesity <sup>a</sup>               | 144   | 27  | 141   | 411    | 50.5 (44.7-56.3) | 93.8 (91.6-96.1) | 84.2 (78.7-89.7) | 74.5 (70.8-78.1) |
| Stroke                                    | 63    | <6  | <50   | 113    | 57.3 (48.0-66.5) | 96.6 (93.3-99.9) | 94.0 (88.4-99.7) | 70.6 (63.6-77.7) |
| Pregnancy <sup>b</sup>                    | 67    | 13  | 93    | 565    | 41.9 (34.2-49.5) | 97.8 (96.5-99.0) | 83.8 (75.7-91.8) | 85.9 (83.2-88.5) |
| No risk factors                           | 1,725 | 321 | 4,209 | 17,447 | 29.1 (27.9-30.2) | 98.2 (98.0-98.4) | 84.3 (82.7-85.9) | 80.6 (80.0-81.1) |

COPD=Chronic obstructive pulmonary disease; TP=True positive; FP=False positive; FN=False negative; TN=True negative; PPV=Positive predictive value; CI=Confidence interval; NPV=Negative predictive value; CCHS=Canadian Community Health Survey

<sup>a</sup>Body mass index >40

<sup>b</sup>Date of delivery between 1 November and 1 June

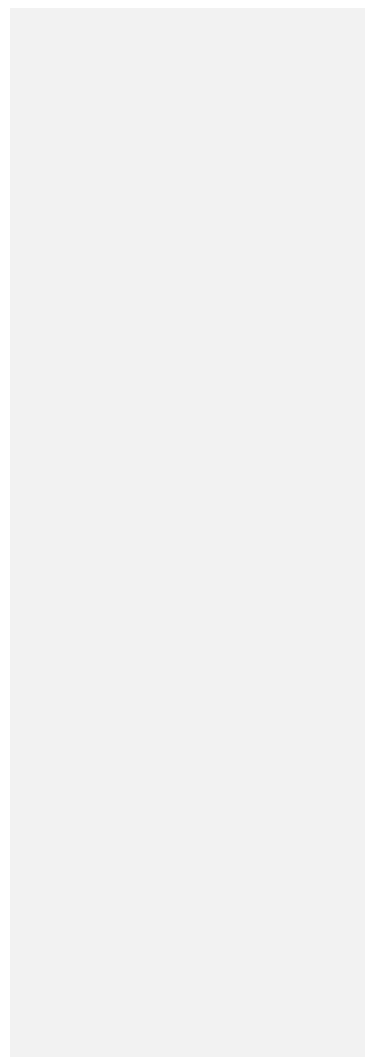

1  
2  
3  
4  
5  
6  
7  
8  
9  
10  
11  
12  
13  
14  
15  
16  
17  
18  
19  
20  
21  
22  
23  
24  
25  
26  
27  
28  
29  
30  
31  
32  
33  
34  
35  
36  
37  
38  
39  
40  
41  
42  
43  
44  
45  
46  
47  
48  
49

Table 3. Performance measures of Ontario Health Insurance Plan physician billing claims compared to self-reported influenza immunization using Canadian Community Health Survey data, restricted to individuals surveyed between 1 February and 31 August

|                                           | TP    | FP  | FN    | TN     | Sensitivity (95% CI) | Specificity (95% CI) | PPV (95% CI)        | NPV (95% CI)     |
|-------------------------------------------|-------|-----|-------|--------|----------------------|----------------------|---------------------|------------------|
| Total                                     | 5,639 | 408 | 5,744 | 16,017 | 49.5 (48.6-50.5)     | 97.5 (97.3-97.8)     | 93.2 (92.6-93.9)    | 73.6 (73.0-74.2) |
| OCHS survey cycle                         |       |     |       |        |                      |                      |                     |                  |
| 2007-08                                   | 3,745 | 276 | 3,831 | 10,414 | 49.4 (48.3-50.6)     | 97.4 (97.1-97.7)     | 93.1 (92.4-93.9)    | 73.1 (72.4-73.8) |
| 2009-10                                   | 1,894 | 132 | 1,913 | 5,603  | 49.8 (48.2-51.3)     | 97.7 (97.3-98.1)     | 93.5 (92.4-94.6)    | 74.5 (73.6-75.5) |
| Age group                                 |       |     |       |        |                      |                      |                     |                  |
| 12-17 years                               | 126   | 34  | 507   | 1,745  | 19.9 (16.8-23.0)     | 98.1 (97.5-98.7)     | 78.8 (72.4-85.1)    | 77.5 (75.8-79.2) |
| 18-49 years                               | 960   | 112 | 2,025 | 9,060  | 32.2 (30.5-33.8)     | 98.8 (98.6-99.0)     | 89.6 (87.7-91.4)    | 81.7 (81.0-82.5) |
| 50-64 years                               | 1,401 | 83  | 1,770 | 3,610  | 44.2 (42.5-45.9)     | 97.8 (97.3-98.2)     | 94.4 (93.2-95.6)    | 67.1 (65.8-68.4) |
| ≥65 years                                 | 3,152 | 179 | 1,442 | 1,602  | 68.6 (67.3-70.0)     | 89.9 (88.6-91.3)     | 94.6 (93.9-95.4)    | 52.6 (50.9-54.4) |
| Sex                                       |       |     |       |        |                      |                      |                     |                  |
| Female                                    | 3,345 | 221 | 3,320 | 8,226  | 50.2 (49.0-51.4)     | 97.4 (97.0-97.7)     | 93.8 (93.0-94.6)    | 71.2 (70.4-72.1) |
| Male                                      | 2,294 | 187 | 2,424 | 7,791  | 48.6 (47.2-50.0)     | 97.7 (97.3-98.0)     | 92.5 (91.4-93.5)    | 76.3 (75.4-77.1) |
| Rural                                     |       |     |       |        |                      |                      |                     |                  |
| Urban                                     | 4,485 | 348 | 4,360 | 12,628 | 50.7 (49.7-51.7)     | 97.3 (97.0-97.6)     | 92.8 (92.1-93.5)    | 74.3 (73.7-75.0) |
| Rural                                     | 1,142 | 59  | 1,376 | 3,357  | 45.4 (43.4-47.3)     | 98.3 (97.8-98.7)     | 95.1 (93.9-96.3)    | 70.9 (69.6-72.2) |
| Has a regular doctor                      |       |     |       |        |                      |                      |                     |                  |
| Yes (<65 years)                           | 2,424 | 218 | 3,941 | 12,705 | 38.1 (36.9-39.3)     | 98.3 (98.1-98.5)     | 91.7 (90.7-92.8)    | 76.3 (75.7-77.0) |
| Yes (≥65 years)                           | 3,119 | 176 | 1,349 | 1,441  | 69.8 (68.5-71.2)     | 89.1 (87.6-90.6)     | 94.7 (93.9-95.4)    | 51.6 (49.8-53.5) |
| No (<65 years)                            | 63    | 11  | 361   | 1,710  | 14.9 (11.5-18.2)     | 99.4 (99.0-99.7)     | 85.1 (77.0-93.2)    | 82.6 (80.9-84.2) |
| No (≥65 years)                            | 33    | <6  | <95   | 161    | 26.2 (18.5-33.9)     | 98.2 (96.1-100.0)    | 91.7 (82.6-100.0)   | 63.4 (57.5-69.3) |
| Risk factors for serious influenza (≥65y) |       |     |       |        |                      |                      |                     |                  |
| Hypertension                              | 2,403 | 121 | 977   | 896    | 71.0 (69.6-72.6)     | 88.1 (86.1-90.1)     | 95.2 (94.4-96.0)    | 47.8 (45.6-50.1) |
| Asthma                                    | 368   | 18  | 159   | 134    | 69.8 (65.9-73.7)     | 88.2 (83.0-93.3)     | 95.3 (93.2-97.4)    | 45.7 (40.0-51.4) |
| Diabetes                                  | 808   | 52  | 332   | 293    | 70.9 (68.2-73.5)     | 84.9 (81.2-88.7)     | 94.0 (92.4-95.5)    | 46.9 (43.0-50.8) |
| Cancer                                    | 494   | 19  | 196   | 186    | 71.6 (68.2-75.0)     | 90.7 (86.8-94.7)     | 96.3 (94.7-97.9)    | 48.7 (43.7-53.7) |
| COPD                                      | 348   | 11  | 164   | 128    | 68.0 (63.9-72.0)     | 92.1 (87.6-96.6)     | 96.9 (95.2-98.7)    | 43.8 (38.1-49.5) |
| Congestive heart failure                  | 345   | 10  | 117   | 94     | 74.7 (70.7-78.6)     | 90.4 (84.7-96.1)     | 97.2 (95.5-98.9)    | 44.5 (37.8-51.3) |
| Myocardial infarction                     | 204   | 12  | 78    | 66     | 72.3 (67.1-77.6)     | 84.6 (76.6-92.6)     | 94.4 (91.4-97.5)    | 45.8 (37.7-54.0) |
| Chronic kidney disease                    | 187   | 10  | 81    | 69     | 69.8 (64.3-75.3)     | 87.3 (80.0-94.7)     | 94.9 (91.9-98.0)    | 46.0 (38.0-54.0) |
| Morbid obesity <sup>a</sup>               | 40    | 0   | 13    | 26     | 75.5 (63.9-87.1)     | 100.0 (100.0-100.0)  | 100.0 (100.0-100.0) | 66.7 (51.9-81.5) |
| Stroke                                    | 191   | 14  | 79    | 70     | 70.7 (65.3-76.2)     | 83.3 (75.4-91.3)     | 93.2 (89.7-96.6)    | 47.0 (39.0-55.0) |
| Immunosuppression                         | 194   | 7   | 84    | 63     | 69.8 (64.4-75.2)     | 90.0 (83.0-97.0)     | 96.5 (94.0-99.0)    | 42.9 (34.9-50.9) |
| Dementia                                  | 59    | 11  | 19    | 31     | 75.6 (66.1-85.2)     | 73.8 (60.5-87.1)     | 84.3 (75.8-92.8)    | 62.0 (48.5-75.5) |
| No risk factors                           | 415   | 35  | 276   | 473    | 60.1 (56.4-63.7)     | 93.1 (90.9-95.3)     | 92.2 (89.7-94.7)    | 63.2 (59.7-66.6) |

1  
2  
3  
4  
5  
6  
7  
8  
9  
10  
11  
12  
13  
14  
15  
16  
17  
18  
19  
20  
21  
22  
23  
24  
25  
26  
27  
28  
29  
30  
31  
32  
33  
34  
35  
36  
37  
38  
39  
40  
41  
42  
43  
44  
45  
46  
47  
48  
49

COPD=Chronic obstructive pulmonary disease; TP=True positive; FP=False positive; FN=False negative; TN=True negative; PPV=Positive predictive value; CI=Confidence interval; NPV=Negative predictive value; CCHS=Canadian Community Health Survey  
<sup>a</sup>Body mass index >40

Figure 1. Crude and adjusted 2010-2011 influenza season vaccine effectiveness estimates for the 2010-11 season, with 95% confidence intervals, from Kwong et al. (2013) before and after adjustment for misclassification bias using the validation results from this study.

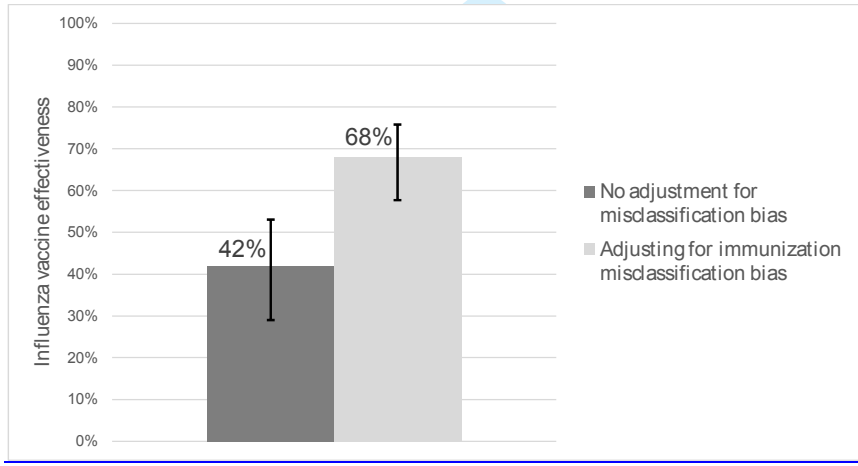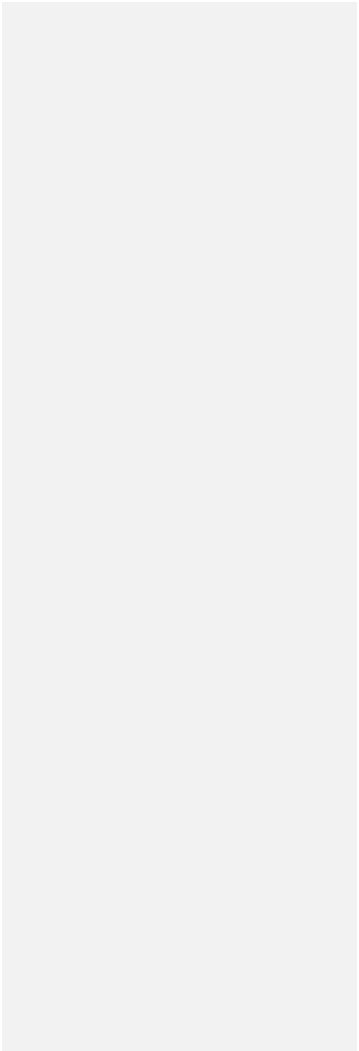

Table e1: The Institute for Clinical Evaluative Sciences databases used in this study and their descriptions

| Database                                                                                         | Description                                                                                                                        |
|--------------------------------------------------------------------------------------------------|------------------------------------------------------------------------------------------------------------------------------------|
| Ontario Health Insurance Plan (OHIP)                                                             | Contains claims data paid for by the Ontario Health Insurance Plan for most healthcare professionals in the province               |
| Canadian Institute for Health Information Discharge Abstract Database (CIHI-DAD)                 | Contains patient-level data for acute, chronic, and day surgery institutions in Ontario                                            |
| Canadian Institute for Health Information National Ambulatory Care Reporting System (CIHI-NACRS) | Contains patient visits to hospital and community based ambulatory care: day surgery, outpatient clinics and emergency departments |
| Canadian Institute for Health Information Same Day Surgery (CIHI-SDS)                            | Contains patient-level data for day surgery institutions in Ontario                                                                |
| Canadian Organ Replacement Register (CORR)                                                       | Contains activity and outcomes of vital organ transplantation and renal dialysis for donors and recipients treated in Ontario      |
| Ontario Renal Reporting System (ORRS)                                                            | Contains data on patients with chronic kidney disease and renal dialysis                                                           |
| Ontario Diabetes Database (ODD)                                                                  | Contains all incident cases of diabetes in Ontario                                                                                 |
| Ontario Cancer Registry (OCR)                                                                    | Contains Ontario residents newly diagnosed, or died, with cancer (except non-melanoma skin cancers)                                |
| Ontario Myocardial Infarction Database (OMID)                                                    | Contains hospitalized patients with first acute myocardial infarction                                                              |
| Chronic Obstructive Pulmonary Disease (COPD)                                                     | Contains all Ontario patients with COPD                                                                                            |
| Ontario Drug Benefit (ODB)                                                                       | Contains claims for prescription drugs received under the ODB program (most are for those $\geq 65$ years of age)                  |
| Ontario Congestive Heart Failure (CHF) Database                                                  | Contains all Ontario individuals identified as having CHF                                                                          |
| Ontario Human Immunodeficiency Virus (HIV) database                                              | Contains all Ontario HIV positive patients                                                                                         |

Table e2: Databases and codes used to define medical conditions

| Medical Condition | Definition                                                                                                                                                                                                                                                                                                 |
|-------------------|------------------------------------------------------------------------------------------------------------------------------------------------------------------------------------------------------------------------------------------------------------------------------------------------------------|
| Hypertension      | Hypertension was defined as <ol style="list-style-type: none"> <li>a) one hospital admission with a hypertension diagnosis, or</li> <li>b) an OHIP claim with a hypertension diagnosis followed within two years by either an OHIP claim or a hospital admission with a hypertension diagnosis.</li> </ol> |

| Medical Condition                            | Definition                                                                                                                                                                                                                                                                                                                                                                                                                                                                                                                                                                                       |
|----------------------------------------------|--------------------------------------------------------------------------------------------------------------------------------------------------------------------------------------------------------------------------------------------------------------------------------------------------------------------------------------------------------------------------------------------------------------------------------------------------------------------------------------------------------------------------------------------------------------------------------------------------|
|                                              | <p data-bbox="383 233 613 260"><u>CIHI-DAD, CIHI-SDS</u></p> <p data-bbox="420 262 899 289">ICD-9 diagnostic codes: 401, 402, 403 404, 405</p> <p data-bbox="420 291 899 319">ICD-10 diagnostic codes: I10, I11, I12, I13, I15</p> <p data-bbox="383 346 444 373"><u>OHIP</u></p> <p data-bbox="420 375 911 403">OHIP diagnostic codes: 401, 402, 403 404, or 405</p>                                                                                                                                                                                                                            |
| Asthma                                       | <p data-bbox="383 438 1032 516">Asthma database was used to identify patients with asthma, based on 2 or more ambulatory care visits and/or 1 or more hospitalizations.(1)</p> <p data-bbox="383 546 444 573"><u>OHIP</u></p> <p data-bbox="383 575 651 602">OHIP diagnostic code: 493</p> <p data-bbox="383 630 500 657"><u>CIHI-DAD</u></p> <p data-bbox="383 659 659 686">ICD-9 diagnostic code: 493</p> <p data-bbox="383 688 724 716">ICD-10 diagnostic codes: J45, J46</p>                                                                                                                 |
| Diabetes                                     | <p data-bbox="383 747 1040 825">ODD was used to identify patients with diabetes, based on 2 OHIP diagnostic codes or 1 OHIP service code or 1 CIHI admission within 2 years.(2)</p> <p data-bbox="383 854 444 882"><u>OHIP</u></p> <p data-bbox="383 884 651 911">OHIP diagnostic code: 250</p> <p data-bbox="383 913 915 940">OHIP service codes: Q040, K029, K030, K045, K046</p> <p data-bbox="383 968 613 995"><u>CIHI-DAD, CIHI-SDS</u></p> <p data-bbox="383 997 659 1024">ICD-9 diagnostic code: 250</p> <p data-bbox="383 1026 837 1054">ICD-10 diagnostic codes: E10, E11, E13, E14</p> |
| Cancer                                       | <p data-bbox="383 1087 1003 1136">OCR was used to identify patients with a history of cancer diagnosed in Ontario except for non-melanoma skin cancer.(3)</p>                                                                                                                                                                                                                                                                                                                                                                                                                                    |
| Chronic obstructive pulmonary disease (COPD) | <p data-bbox="383 1171 1049 1249">COPD database was used to identify patients with COPD, based on 3 or more ambulatory care visits and/or 1 or more hospitalizations within 2 years.(4)</p> <p data-bbox="383 1278 444 1306"><u>OHIP</u></p> <p data-bbox="383 1308 761 1335">OHIP diagnostic codes: 491, 492, 496</p> <p data-bbox="383 1362 500 1390"><u>CIHI-DAD</u></p> <p data-bbox="383 1392 766 1419">ICD-9 diagnostic codes: 491, 492, 496</p> <p data-bbox="383 1421 818 1449">ICD-10 diagnostic codes: J41, J42, J43, J44</p>                                                          |

| Medical Condition                 | Definition                                                                                                                                                                                                                                                                                                                                                                                                                                                                                                                                                                                                                                                                                                                                                                             |
|-----------------------------------|----------------------------------------------------------------------------------------------------------------------------------------------------------------------------------------------------------------------------------------------------------------------------------------------------------------------------------------------------------------------------------------------------------------------------------------------------------------------------------------------------------------------------------------------------------------------------------------------------------------------------------------------------------------------------------------------------------------------------------------------------------------------------------------|
| Congestive heart failure (CHF)    | <p data-bbox="383 205 1062 289">CHF database was used to identify patients with CHF, based on 1 CIHI NACRS, CIHI-DAD, CIHI-SDS, or OHIP claim and a second claim (from either) in 1 year.(5)</p> <p data-bbox="383 317 1062 371"><u>OHIP</u><br/>OHIP diagnostic code: 428</p> <p data-bbox="383 401 1062 485"><u>CIHI-DAD, CIHI-SDS</u><br/>ICD-9 diagnostic code: 428<br/>ICD-10 diagnostic codes: I500, I501, I509</p>                                                                                                                                                                                                                                                                                                                                                              |
| Acute myocardial infarction (AMI) | <p data-bbox="383 514 1062 569">OMID was used to identify patients with a history of AMI using OHIP, CIHI-DAD, and CIHI-SDS.(6)</p> <p data-bbox="383 598 1062 758"><u>OHIP:</u><br/>OHIP service codes: C132, C133, C134, C135, C136, C137, C139, C435, C602, C603, C604, C605, C606, C607, C609, C675, C002, C003, C004, C005, C006, C007, C009, C905, G297, G557, G558, G559, G400, G401, G402, G405, G406, G407, R742, R743, Z434, Z442.</p> <p data-bbox="383 787 1062 968"><u>CIHI-DAD, CIHI-SDS</u><br/>CCI procedure codes: 31S10, 31P10, 2HZ28, 11J50, 11J57, or 11J76<br/>CCP procedure codes: 4802, 4803, 4809, 4892, 4893, 4894, 4895, 4896, 4897, 4898, 4996, or 4997<br/>ICD-9 diagnostic codes: 410, 411, 413, or 428<br/>ICD-10 diagnostic codes: I21, I50, or I20</p> |
| Chronic kidney disease (CKD)      | <p data-bbox="383 997 1062 1024">Identifying patients with CKD(7)</p> <p data-bbox="383 1054 1062 1108"><u>OHIP</u><br/>OHIP diagnostic codes: 403, 585</p> <p data-bbox="383 1138 1062 1213"><u>CIHI NACRS, CIHI-DAD</u><br/>ICD-10 diagnostic codes: E102, E112, E132, E142, I12, I13, N08, N18, N19</p> <hr/> <p data-bbox="383 1243 1062 1270">Identifying patients on chronic dialysis(8)</p> <p data-bbox="383 1299 1062 1354">At least 2 of any of the following codes in OHIP, CIHI-DAD, or CIHI-SDS separated by at least 90 days, but less than 150 days</p> <p data-bbox="383 1383 1062 1442"><u>OHIP</u><br/>OHIP service codes: R849, G323, G325, G326, G860, G862, G865</p>                                                                                              |

| Medical Condition | Definition                                                                                                                                                                                                                                                                                                                                                                                                                                                                                                                                                                                                                                                                                                                                                                                                                                                                                                                                                                                                                                                                                                                                                                                            |
|-------------------|-------------------------------------------------------------------------------------------------------------------------------------------------------------------------------------------------------------------------------------------------------------------------------------------------------------------------------------------------------------------------------------------------------------------------------------------------------------------------------------------------------------------------------------------------------------------------------------------------------------------------------------------------------------------------------------------------------------------------------------------------------------------------------------------------------------------------------------------------------------------------------------------------------------------------------------------------------------------------------------------------------------------------------------------------------------------------------------------------------------------------------------------------------------------------------------------------------|
|                   | <p data-bbox="386 180 1057 258">G863, G866, G330, G331, G332, G333, G861, G082, G083, G085, G090, G091, G092, G093, G094, G095, G096, G294, G295, G864, H540, H740</p> <p data-bbox="386 289 716 373"><u>CIHI-DAD, CIHI-SDS</u><br/>CCI procedure codes: 5195, 6698<br/>CCP procedure code: 1PZ21</p> <p data-bbox="386 405 1045 516"><u>CORR</u><br/>Treatment codes: 060, 111, 112, 113, 121, 122, 123, 131, 132, 133, 141, 151, 152, 211, 221, 231, 241, 242, 251, 252, 311, 312, 313, 321, 322, 323, 331, 332, 333, 413, 423, 433, 443, 453</p> <p data-bbox="386 548 651 600"><u>ORRS</u><br/>Patients included in ORRS</p> <hr/> <p data-bbox="386 632 732 684"><u>Exclusion criteria:</u><br/>Patients with kidney transplants(9)</p> <p data-bbox="386 716 711 768"><u>OHIP</u><br/>OHIP service codes: S435, S434</p> <p data-bbox="386 800 667 873"><u>CIHI DAD</u><br/>CCP procedure code: 6759<br/>CCI procedure code: 1PC85</p> <p data-bbox="386 905 1057 989"><u>CORR</u><br/>Treatment code: 171 plus one or more of Transplanted Organ Codes (1-3): 10, 11, 12, 18, 19</p> <p data-bbox="386 1020 894 1073"><u>ORRS</u><br/>Type of event during patient care: Transplanted (tx)</p> |
| Stroke            | <p data-bbox="386 1108 1045 1192">CIHI-DAD was used to identify patients with a history of acute ischemic stroke, based on at least one hospitalization with the most responsible diagnosis coded with one of the following codes (10):</p> <p data-bbox="386 1224 1016 1308"><u>CIHI-DAD, CIHI-SDS</u><br/>ICD-9 diagnostic codes: 434, 436<br/>ICD-10 diagnostic codes: I63 (excluding 163.6), I64, H34.1</p>                                                                                                                                                                                                                                                                                                                                                                                                                                                                                                                                                                                                                                                                                                                                                                                       |



| Medical Condition | Definition                                                                                                                                                                                                                                                                                                                                                                                                                                                                                                                                                                                                                                                                                                                                                                                                                                                                                                                                                                   |
|-------------------|------------------------------------------------------------------------------------------------------------------------------------------------------------------------------------------------------------------------------------------------------------------------------------------------------------------------------------------------------------------------------------------------------------------------------------------------------------------------------------------------------------------------------------------------------------------------------------------------------------------------------------------------------------------------------------------------------------------------------------------------------------------------------------------------------------------------------------------------------------------------------------------------------------------------------------------------------------------------------|
| Immunosuppression | <p data-bbox="383 176 1062 233">ACG macro was used to identify patients in OHIP, CIHI-NACRS, and CIHI-DAD(11) with any mention of immune system disorders.</p> <p data-bbox="383 260 1062 317">In addition, the following databases and definitions were used to identify patients with immunosuppression:</p> <p data-bbox="383 344 1062 457"><u>ODB</u><br/>30 days of oral corticosteroids in the past 6 months, antineoplastic use in the past 6 months, or use of another immunocompromising drug in the past 6 months</p> <p data-bbox="383 485 1062 598"><u>CORRLINK</u><br/>CORRLINK is a dataset in ICES which links CORR and CIHI-DAD data. This database only includes patients that have received an organ transplant and does not include dialysis patients.</p> <p data-bbox="383 625 1062 739"><u>HIV</u><br/>HIV database was used to identify patients with HIV, based on 3 physician claims in 3 years with OHIP diagnostic codes: 042, 043 or 044(12)</p> |
| Dementia          | <p data-bbox="383 764 1062 856">1 hospitalization for dementia and/or 3 ambulatory visits for dementia, each separated by at least 30 days, within 2 years and/or 1 prescription from ODB(13)</p> <p data-bbox="383 884 1062 940"><u>OHIP</u><br/>OHIP diagnostic codes: 290, 331</p> <p data-bbox="383 968 1062 1024"><u>CIHI-DAD, CIHI-SDS</u><br/>ICD-10 diagnostic codes: F00, F01, F02, F03, G30</p> <p data-bbox="383 1052 1062 1108"><u>ODB</u><br/>1 prescription for a cholinesterase inhibitor</p>                                                                                                                                                                                                                                                                                                                                                                                                                                                                 |

CCI= Canadian Classification of Health Interventions, CCP=Canadian Classification of Procedures, ACG=Adjusted Clinical Groups®

## References

1. Gershon AS, Wang C, Guan J, Vasilevska-Ristovska J, Cicutto L, To T. Identifying patients with physician-diagnosed asthma in health administrative databases. *Can Respir J* 2009 Nov;16(6):183-8.
2. Hux JE, Ivis F, Flintoft V, Bica A. Diabetes in Ontario: determination of prevalence and incidence using a validated administrative data algorithm. *Diabetes Care* 2002 Mar;25(3):512-6.
3. Hall S, Schulze K, Groome P, Mackillop W, Holowaty E. Using cancer registry data for survival studies: the example of the Ontario Cancer Registry. *J Clin Epidemiol* 2006 Jan;59(1):67-76.
4. Gershon AS, Wang C, Guan J, Vasilevska-Ristovska J, Cicutto L, To T. Identifying individuals with physician diagnosed COPD in health administrative databases. *COPD* 2009 Oct;6(5):388-94.
5. Schultz SE, Rothwell DM, Chen Z, Tu K. Identifying cases of congestive heart failure from administrative data: a validation study using primary care patient records. *Chronic Dis Inj Can* 2013 Jun;33(3):160-6.
6. Austin PC, Daly PA, Tu JV. A multicenter study of the coding accuracy of hospital discharge administrative data for patients admitted to cardiac care units in Ontario. *Am Heart J* 2002 Aug;144(2):290-6.
7. Fleet JL, Dixon SN, Shariff SZ, Quinn RR, Nash DM, Harel Z, et al. Detecting chronic kidney disease in population-based administrative databases using an algorithm of hospital encounter and physician claim codes. *BMC Nephrol* 2013;14:81.
8. Quinn RR, Laupacis A, Austin PC, Hux JE, Garg AX, Hemmelgarn BR, et al. Using administrative datasets to study outcomes in dialysis patients: a validation study. *Med Care* 2010 Aug;48(8):745-50.
9. Lam NN, McArthur E, Kim SJ, Knoll GA. Validation of kidney transplantation using administrative data. *Can J Kidney Health Dis* 2015;2:20.
10. The Canadian Stroke Strategy. Canadian Stroke Strategy Core Performance Indicator Update 2010. [http://www.strokebestpractices.ca/wp-content/uploads/2012/07/Stroke\\_Core\\_ENG.pdf](http://www.strokebestpractices.ca/wp-content/uploads/2012/07/Stroke_Core_ENG.pdf) 2010.
11. Starfield B, Weiner J, Mumford L, Steinwachs D. Ambulatory care groups: a categorization of diagnoses for research and management. *Health Serv Res* 1991 Apr;26(1):53-74.
12. Antoniou T, Zagorski B, Loutfy MR, Strike C, Glazier RH. Validation of case-finding algorithms derived from administrative data for identifying adults living with human immunodeficiency virus infection. *PLoS One* 2011;6(6):e21748.
13. Bronskill S. Personal communication regarding dementia algorithm.

Table 1: Studies validating self-reported influenza immunization

| Author, year    | PMID     | Population                                          | Self-report | Reference                                        | n    | Sn  | Sp | PPV | NPV | Kappa |
|-----------------|----------|-----------------------------------------------------|-------------|--------------------------------------------------|------|-----|----|-----|-----|-------|
| Hutchison, 1989 | 2790635  | Seniors in a group family practice, Burlington, ON  | Mail        | Medical records                                  | 535  | 93  | 98 | 96  | 97  | 88    |
| MacDonald, 1999 | 10198654 | Managed care organization                           | Mail        | Medical records                                  | 237  | 98  | 71 | 92  | 91  | 75    |
| MacDonald, 1999 | 10198654 | Veteran Affairs (VA)                                | Mail        | Medical records                                  | 195  | 100 | 79 | 82  | 100 | 79    |
| Martin, 2000    | 10722987 | >21 y, Colorado HMO                                 | Telephone   | Medical records                                  | 599  | 86  | 73 | 86  | 73  | N/A   |
| Zimmerman, 2003 | 12615445 | >65 y, inner-city, VA, rural, suburban practices    | Telephone   | Medical records                                  | 819  | 98  | 38 | 62  | 94  | 36    |
| Mangtani, 2007  | 16740194 | 65-84 y, United Kingdom general practices           | Mail        | Medical records                                  | 354  | 95  | 90 | 93  | 93  | 85    |
| Skull, 2007     | 17499402 | ≥65 y, inpatients at 2 Australian hospitals         | Telephone   | Medical records                                  | 2980 | 98  | 56 | 88  | 91  | 62    |
| Irving, 2009    | 19729083 | All ages, Marshfield Clinic, WI                     | In-person   | Immunization registry, medical and other records | 2907 | 95  | 95 | 95  | 96  | N/A   |
| Rolnick, 2013   | 23806243 | ≥18 y, Integrated health care delivery system in MN | Telephone   | Medical records                                  | 3499 | 93  | 66 | 66  | 93  | 56    |

PMID=PubMed ID; Sn=sensitivity; Sp=specificity; PPV=positive predictive value; NPV=negative predictive value

For Peer Review Only
